# Supplementary material for: In Situ Functionalization of Silver Nanoparticles by Gallic Acid as a Colorimetric Sensor for Simple Sensitive Determination of Melamine in Milk
Source: PubMed Central journal article supplement — ACS Omega. 2021 Aug 27;6(36):23630–5. doi: 10.1021/acsomega.1c03927 (PMC8444319; doi:10.1021/acsomega.1c03927), 2021-08-27
Supplement: ao1c03927_si_001.pdf [file ao1c03927_si_001.pdf]

## Supporting Information

In Situ Functionalization of Silver Nanoparticles by Gallic Acid as a Colorimetric Sensor for Simple Sensitive Determination of Melamine in Milk

Xuexia Liu<sup>1</sup>, Juan Wang<sup>1</sup>, Yinfeng Wang<sup>1</sup>, Chunfang Huang<sup>1</sup>, Zhijun Wang<sup>1,\*</sup>, and Limin Liu<sup>1,\*</sup>

<sup>1</sup> School of Chemistry and Chemical Engineering, Jinggangshan University, Ji'an 343009, China

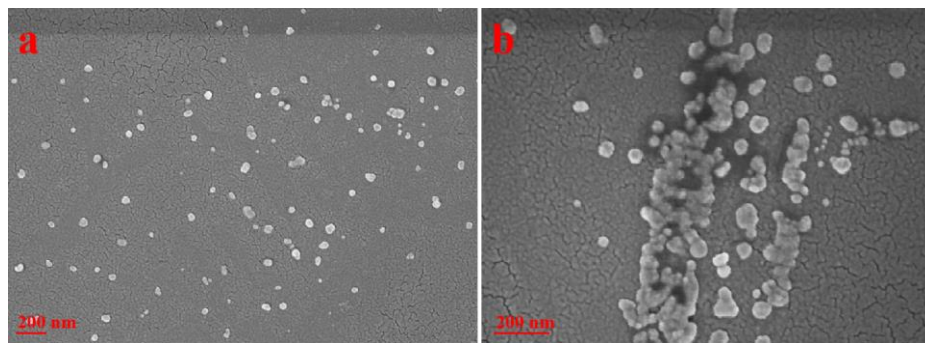

**Figure S1.** The FESEM of AgNPs (a) absence and (b) presence of melamine

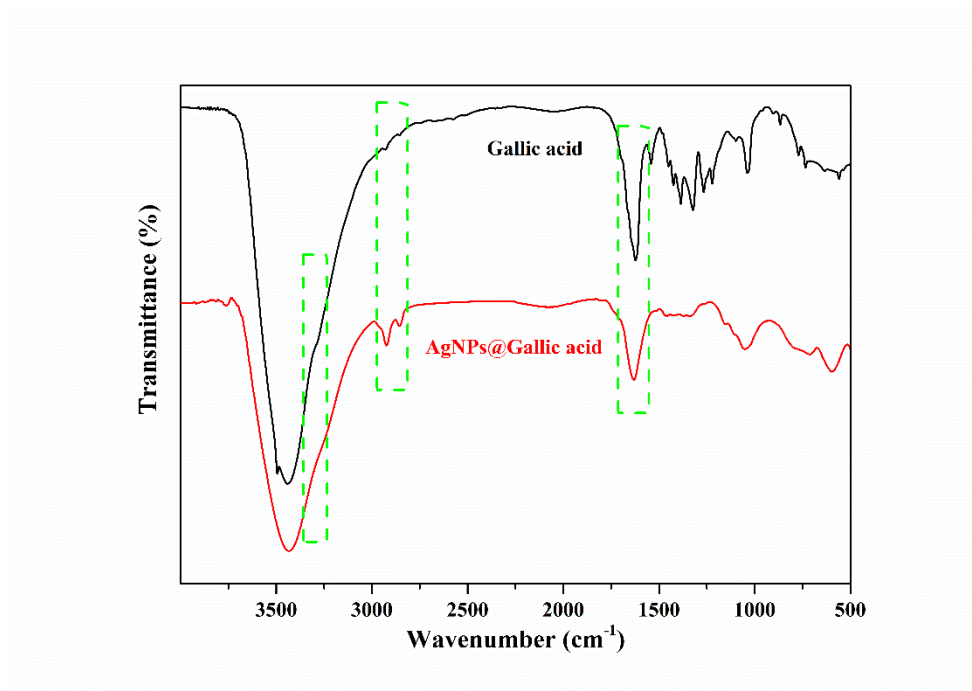

**Figure S2.** FTIR spectra of Gallic acid and AgNPs@Gallic acid.

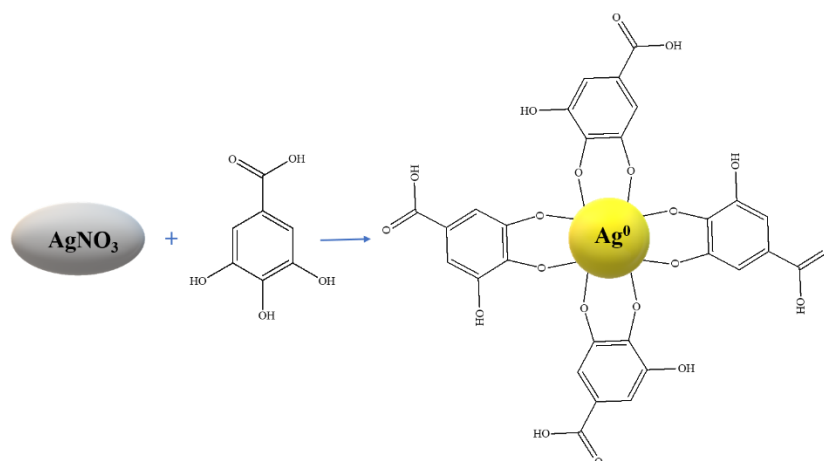

**Figure S3.** Schematic illustration of formation of AgNPs@Gallic acid.

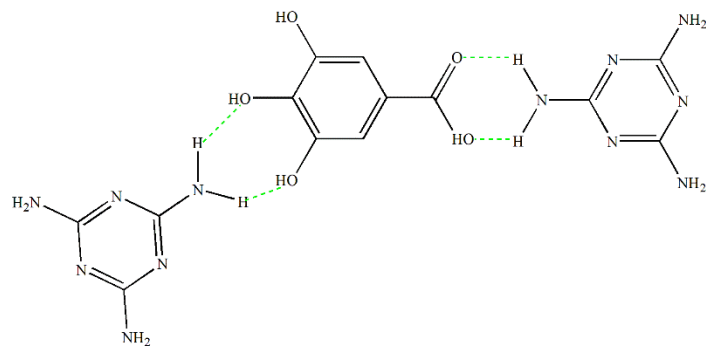

**Figure S4.** Schematic illustration of hydrogen-bonding interaction between melamine and Gallic acid.

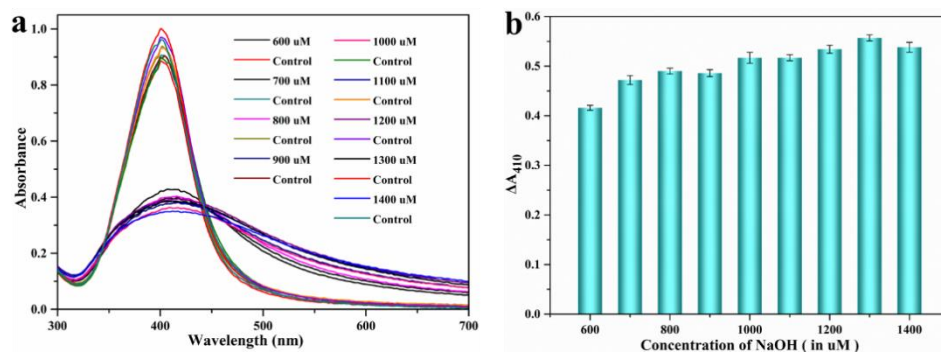

**Figure S5.** The effect of NaOH concentration towards the gallic acid functionalized AgNPs. (a) UV-Vis spectra and (b)  $\Delta A_{410}$  of the AgNPs@Gallic acid assays.

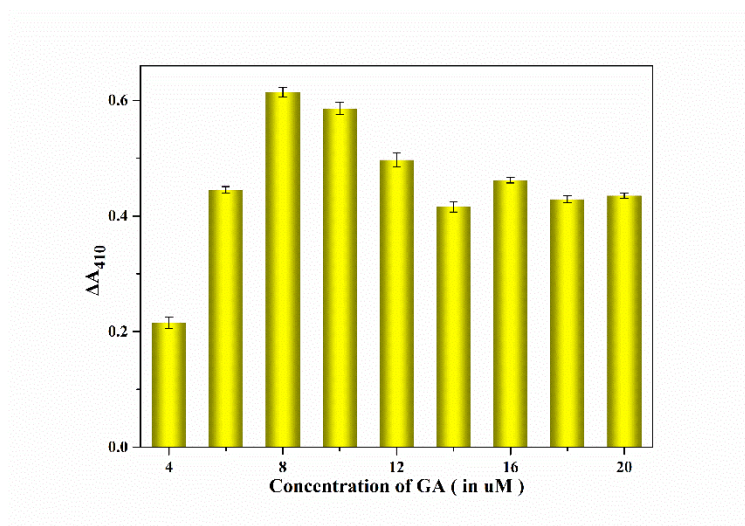

**Figure S6.** Effect of concentrations of gallic acid on  $\Delta A_{410}$  of AgNPs@Gallic acid assays.

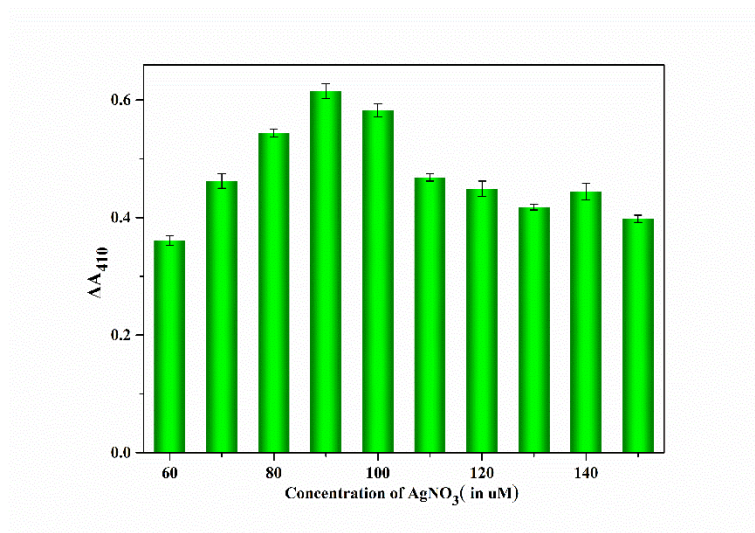

**Figure S7.** Effect of AgNO<sub>3</sub> concentration on ΔA<sub>410</sub> of AgNPs@Gallic acid assays.



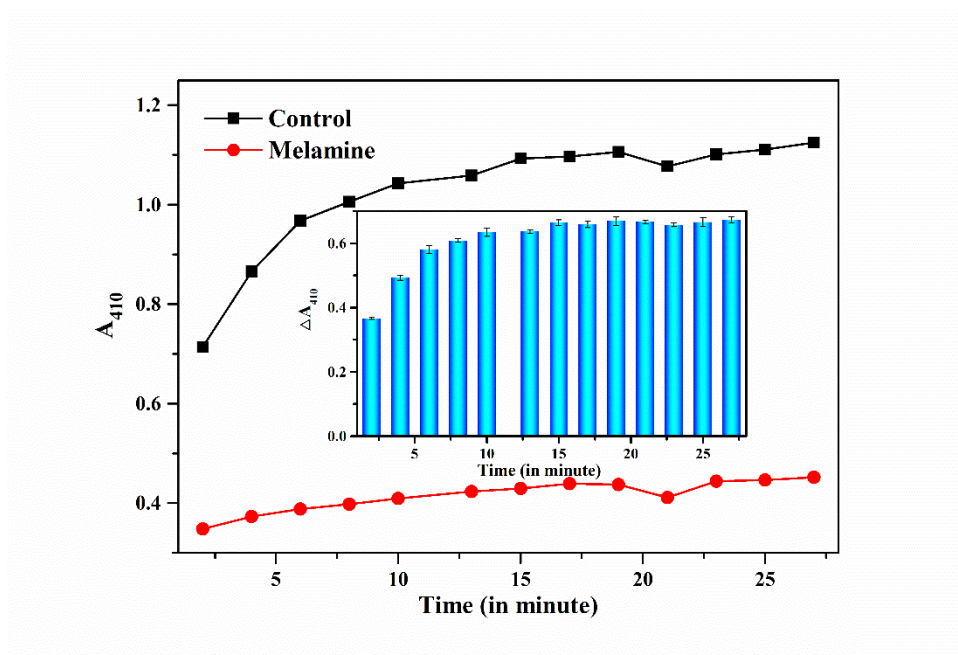

**Figure S8.**  $A_{410}$  versus reaction time for oxidization reaction of AgNPs@Gallic acid assays. Inset: the  $\Delta A_{410}$  in presence and absence of melamine with the increase of reaction time.

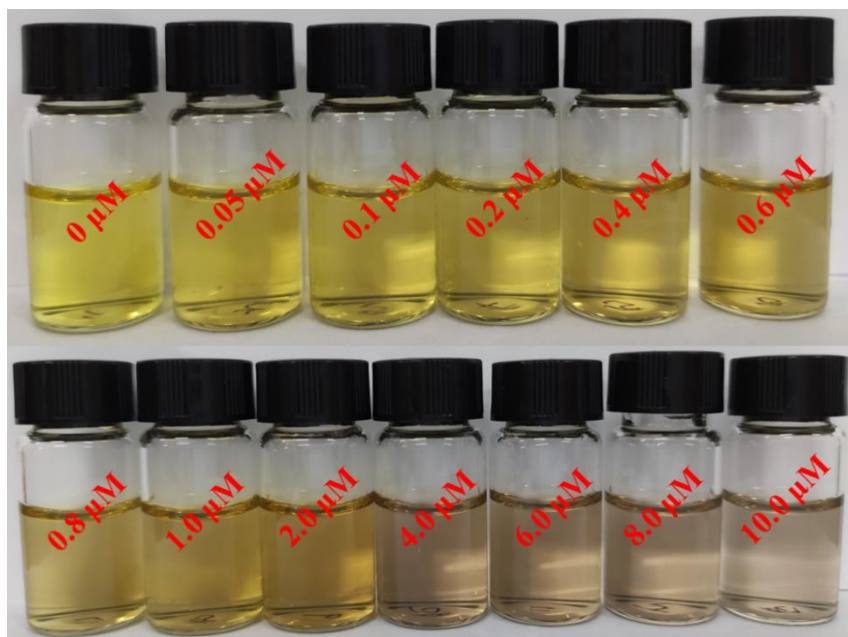

**Figure S9.** Photographs of AgNPs@Gallic acid solution in the absence and presence of different concentrations of melamine.

**Table S1.** Comparison of various colorimetry sensing assays for melamine

| Sensing Material         | Detection Limit                      | Reference        |
|--------------------------|--------------------------------------|------------------|
| Ascorbic acid-AgNPs      | 0.1 ppm                              | 1                |
| Sodium D-gluconate-AgNPs | 0.06 ppm                             | 2                |
| B-cyclodextrin-AgNPs     | $4.98 \times 10^{-6}$ M              | 3                |
| pNA-AgNPs                | 0.1 ppm                              | 4                |
| Ag-Rutin                 | 0.1 ppm                              | 5                |
| AgNPs/dopamine           | 0.01 ppm                             | 6                |
| Chitosan-AuNPs           | $6 \times 10^{-6}$ g L <sup>-1</sup> | 7                |
| AgNPs                    | 0.07 mg L <sup>-1</sup>              | 8                |
| AgNPs                    | 0.5 $\mu$ m                          | 9                |
| AgNPs                    | 0.79 $\mu$ m                         | 10               |
| AgNPs                    | 0.01 $\mu$ m                         | 11               |
| AgNPs                    | 3.609 nM                             | 12               |
| AgNPs@Gallic acid        | 0.012 ppm                            | <b>This Work</b> |

(1) Varun S.; Kiruba Daniel S. C. G.; Gorthi S. S. Rapid sensing of melamine in milk by interference green synthesis of silver nanoparticles. *Mat. Sci. Eng. C-Mater.* **2017**, 74, 253-258.

(2) Kaleeswaran P.; Nandhini T.; Pitchumani K. Naked eye sensing of melamine: aggregation induced recognition by sodium D-gluconate stabilised silver nanoparticles. *New J. Chem.* **2016**, 40, 3869-3874.

(3) Xavier S. S. J.; Karthikeyan C.; kumar G. G.; Kim A. R.; Yoo D. J. Colorimetric detection of melamine using  $\beta$ -cyclodextrin-functionalized silver nanoparticles. *Anal. Methods* **2014**, 6, 8165-8172.

(4) Han C. P.; Li H. B. Visual detection of melamine in infant formula at 0.1 ppm level based on silver nanoparticles. *Analyst* **2010**, 135, 583-588.

(5) Jigyasa; Rajput J. K. Bio-polyphenols promoted green synthesis of silver nanoparticles for facile and ultra-sensitive colorimetric detection of melamine in milk.

*Biosens. Bioelectron.* **2018**, 120, 153-159.

(6) Ma Y. R.; Niu H. Y.; Zhang X. L.; Cai Y. Q. One-step synthesis of silver/dopamine nanoparticles and visual detection of melamine in raw milk. *Analyst* **2011**, 136, 4192-4196.

(7) Guan H. N.; Yu J.; Chi D. F. Label-free colorimetric sensing of melamine based on chitosan-stabilized gold nanoparticles probes. *Food Control* **2013**, 32, 35-41.

(8) Inamuddin; Kanchi S. One-step biosynthesis of silver nanoparticle using *Colocasia esculenta* extract: colorimetric detection of melamine in biological samples. *J. Photoch. Photobio. A* **2020**, 391, 112310.

(9) Kaleeswaran P.; Nandhini T.; Pitchumani K. Naked eye sensing of melamine: aggregation induced recognition by sodium d-gluconate stabilised silver nanoparticles. *New J. Chem.* **2016**, 40, 3869-3874.

(10) Daniel S. K.; Julius L. A. N.; Gorthi S. S. Instantaneous detection of melamine by interference biosynthesis of silver nanoparticles. *Sensor. Actuat. B-Chem.* **2017**, 238, 641-650.

(11) Alam M. F.; Laskar A. A.; Ahmed S.; Shaida M. A.; Younus H. Colorimetric method for the detection of melamine using in-situ formed silver nanoparticles via tannic acid. *Spectrochim. Acta, Part A* **2017**, 183, 17-22.

(12) Farrokhnia M.; Karimi S.; Askarian S. Strong Hydrogen Bonding of Gallic Acid during Synthesis of an Efficient AgNPs Colorimetric Sensor for Melamine Detection via Dissynthesis. *Strategy ACS Sustainable Chem. Eng.* **2019**, 7, 6672-6684.
